# Supplementary material for: Rational design of self-supported Ni3S2 nanoparticles as a battery type electrode material for high-voltage (1.8 V) symmetric supercapacitor applications
Source: Royal Society of Chemistry journal article supplement (doi:10.1039/d1ce00073j), 2021-01-01
Supplement: d1ce00073j1.pdf [file d1ce00073j1.pdf]

## Supporting information

### **Rational Design of Self-supported Ni<sub>3</sub>S<sub>2</sub> Nanoparticles as a Battery Type Electrode Material for High-Voltage (1.8 V) Symmetric Supercapacitor Applications**

Muhammad Sajjad<sup>1,2</sup>, Yaqoob Khan<sup>3</sup>

<sup>1</sup>School of Chemical Science and Engineering, Yunnan University, Kunming 650091, P. R. China

<sup>2</sup>Institute of Energy Storage Technologies, Yunnan University 650091, P. R. China

<sup>3</sup>Nanosciences and Technology Department, National Center for Physics, QAU Campus, Islamabad 45320, Pakistan

Author Email: [sajjadfisica@gmail.com](mailto:sajjadfisica@gmail.com)

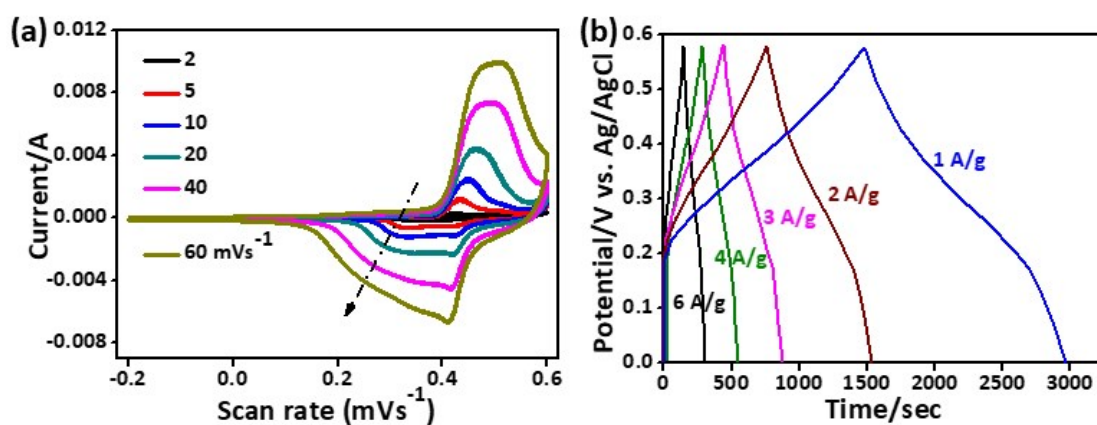

**Figure S1.** A separate graph of CV and GCD curves at the potential window of 0.0 to 0.6 V.

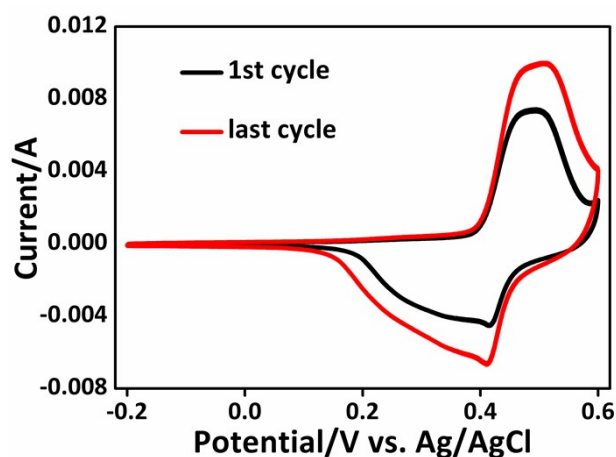

**Figure S2.** CV curves of the first and last cycle.

The GCD curve at  $0.5 \text{ A g}^{-1}$  is shown in **Fig. S3**. As seen, the voltage cut-off is limited to only 1.6 V (compared to  $5 \text{ A g}^{-1}$ , and even other higher current densities are given in **Fig. 5**). The short discharge time is another drawback of taking such a low current density for GCD measurements. Hence, we optimized and then selected that at the current of  $5 \text{ A g}^{-1}$ , the best performance in terms of (potential window and discharge time) is achieved for the active electrode material. This signifies that  $5 \text{ A g}^{-1}$  is the suitable and optimized current density for this work.

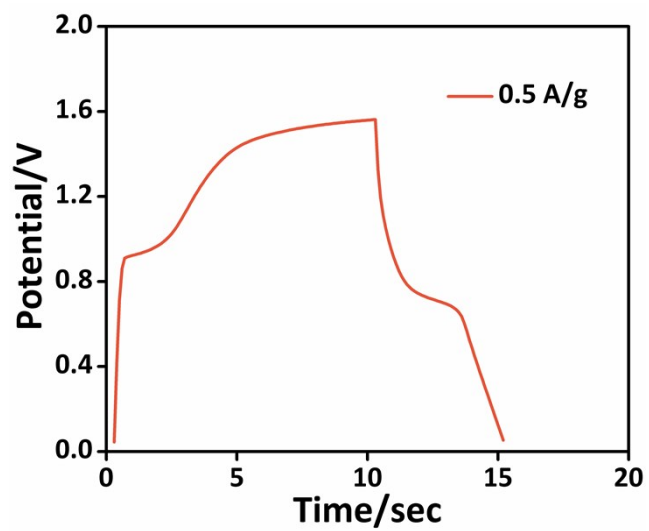

**Figure S3.** GCD curve at 0.5 A/g.
